# Supplementary material for: The one-pot synthesis of porous Ni0.85Se nanospheres on graphene as an efficient and durable electrocatalyst for overall water splitting
Source: Royal Society of Chemistry journal article supplement (doi:10.1039/d0nj04197a), 2020-01-01
Supplement: d0nj04197a1.pdf [file d0nj04197a1.pdf]

## Electronic Supplementary Information

# **One-pot synthesis porous nanosphere Ni<sub>0.85</sub>Se on graphene as efficient and durable electrocatalyst for overall water splitting**

Guigui Liu<sup>a</sup>, Chao Shuai<sup>a</sup>, Zunli Mo<sup>\*a</sup>, Ruibin Guo<sup>a</sup>, Nijuan Liu<sup>a</sup>, Xiaohui Niu<sup>a</sup>,  
Qibing Dong<sup>a</sup>, Jia Wang<sup>a</sup>, Qinqin Gao<sup>a</sup>, Ying Chen<sup>a</sup>, Wentong Liu<sup>a</sup>

(<sup>a</sup> Research Center of Gansu Military and Civilian Integration Advanced Structural  
Materials, Key Laboratory of Eco-Environment-Related Polymer Materials, Ministry  
of Education of China, Key Laboratory of Polymer Materials of Gansu Province,  
College of Chemistry and Chemical Engineering, Northwest Normal University,  
Lanzhou 730070, China)

\* Corresponding author. Tel.: +86-13919467372

Email address: mozlnwnu@126.com

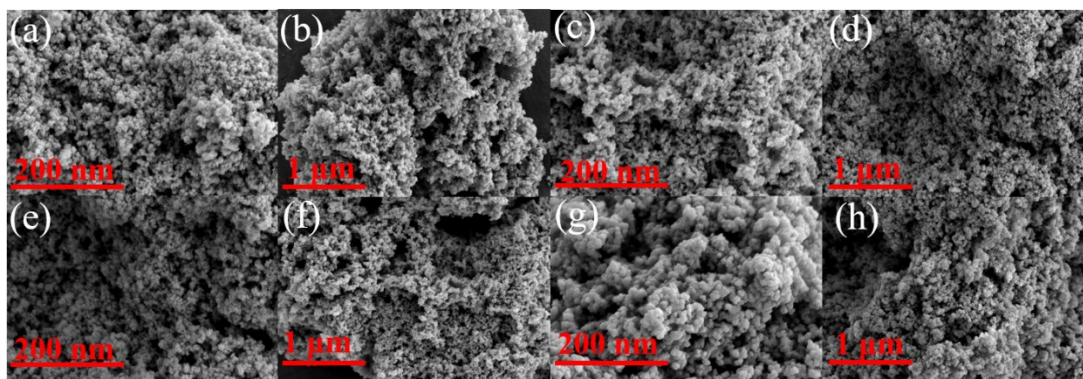

**Figure S1.** SEM images of  $\text{Ni}_{0.85}\text{Se}$  under the different hydrothermal temperature conditions (with the hydrothermal time is 10 h): (a, b) 120 °C, (c, d) 160 °C, (e, f) 180 °C and (g, h) 200 °C.

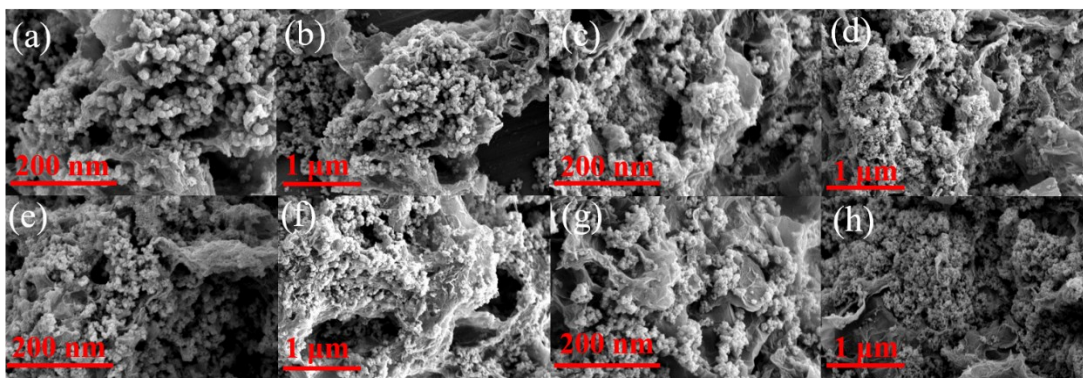

**Figure S2.** SEM images of  $\text{Ni}_{0.85}\text{Se}/\text{RGO}$  under the different hydrothermal temperature conditions (with the hydrothermal time is 10 h): (a, b) 120 °C, (c, d) 160 °C, (e, f) 180 °C and (g, h) 200 °C.

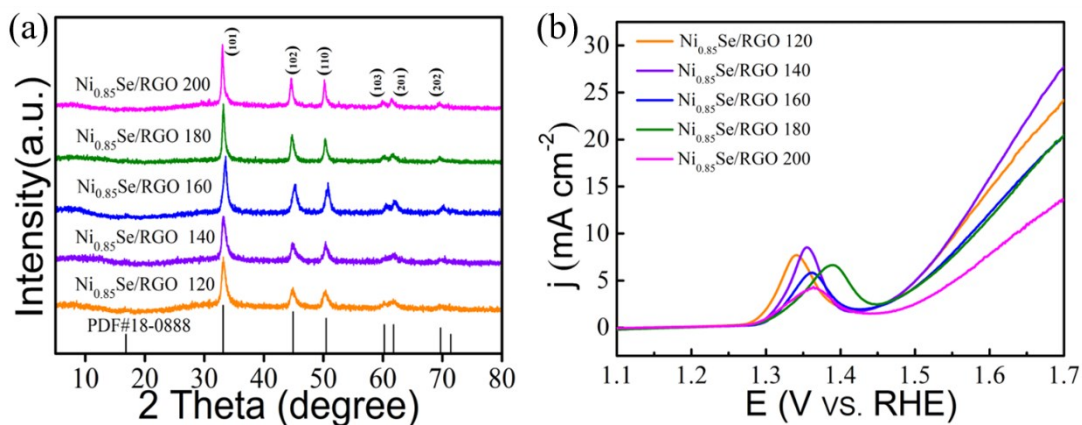

**Figure S3.** (a) The XRD patterns and (b) the polarization curves of the  $\text{Ni}_{0.85}\text{Se}/\text{RGO}$  in different temperature conditions (with the hydrothermal time is 10h).

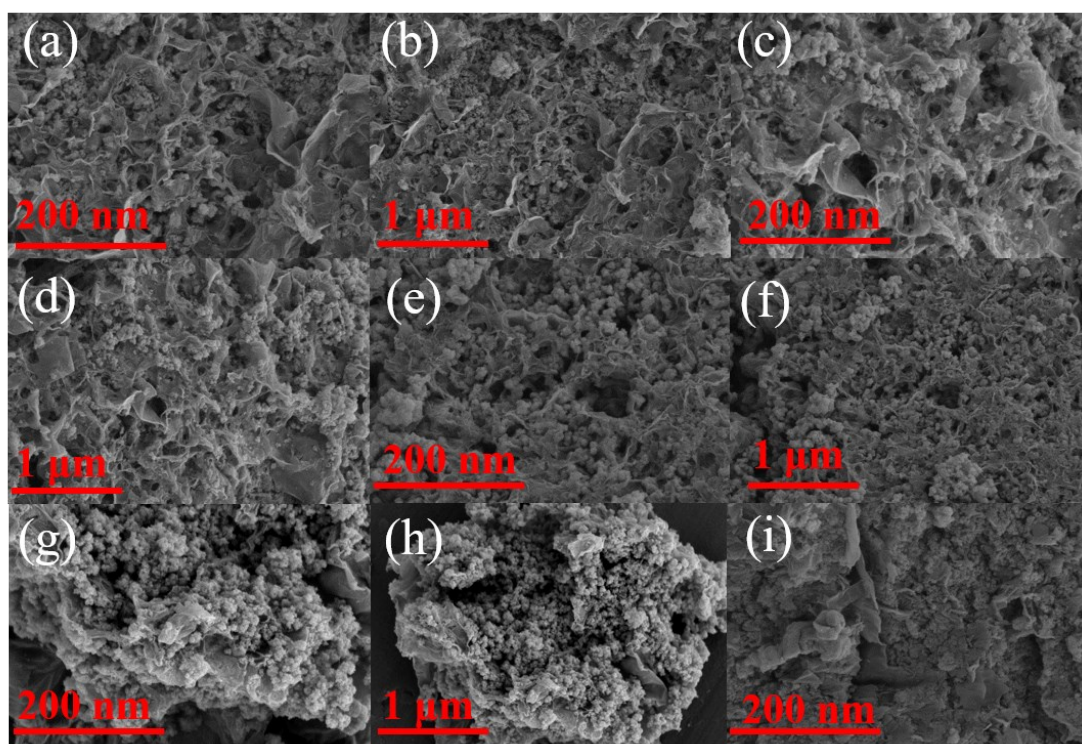

**Figure S4.** SEM images of  $\text{Ni}_{0.85}\text{Se}/\text{RGO}$  under the different hydrothermal time conditions (with the hydrothermal temperature is 140 °C): (a, b) 6 h, (c, d) 8 h, (e, f) 12 h, (g, h) 14 h and (i) 16 h.



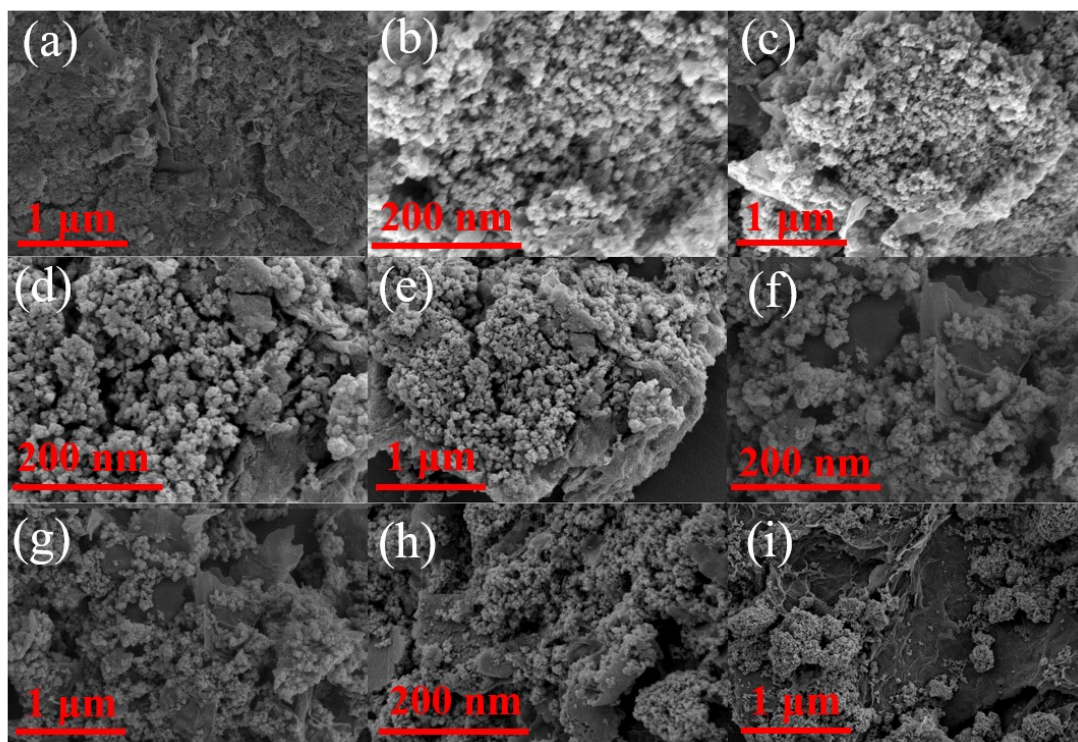

**Figure S5.** SEM images of  $\text{Ni}_{0.85}\text{Se}/\text{RGO}$  under the different hydrothermal time conditions (with the hydrothermal temperature is  $140^\circ\text{C}$ ): (a) 16 h, (b, c) 18 h, (d, e) 20 h, (f, g) 20 h and (i) 24 h.

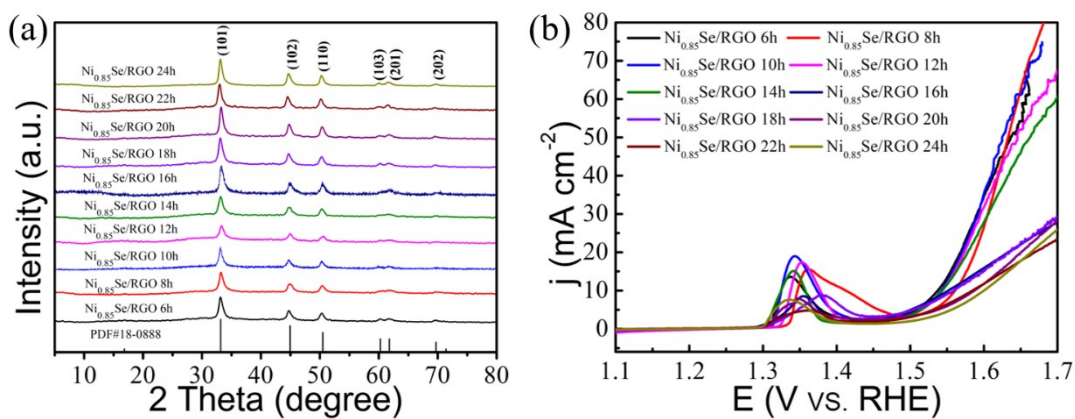

**Figure S6.** (a) The XRD patterns and the polarization curves of the  $\text{Ni}_{0.85}\text{Se}/\text{RGO}$  in different time conditions (with the hydrothermal temperature is  $140^\circ\text{C}$ ).

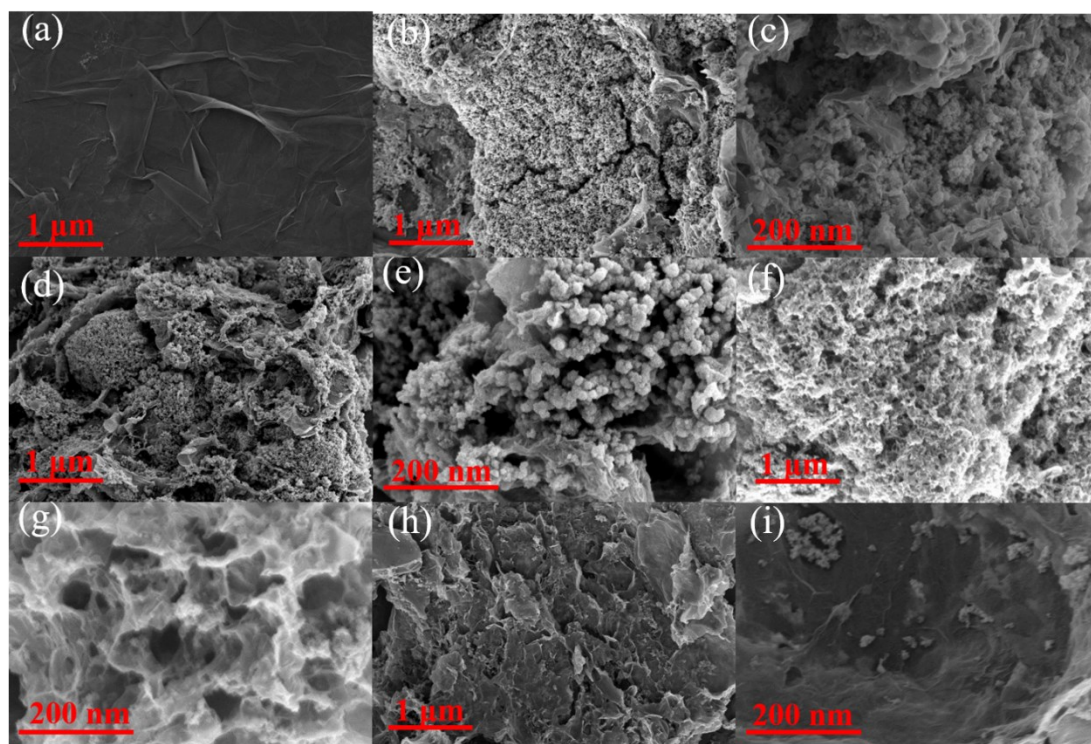

**Figure S7.** SEM images of  $\text{Ni}_{0.85}\text{Se}/\text{RGO}$  synthesized by varying the GO mass: (a) RGO, (b, c)  $\text{Ni}_{0.85}\text{Se}/\text{RGO-1}$ , (d, e)  $\text{Ni}_{0.85}\text{Se}/\text{RGO-2}$ , (f, g)  $\text{Ni}_{0.85}\text{Se}/\text{RGO-4}$  and (h, i)  $\text{Ni}_{0.85}\text{Se}/\text{RGO-5}$ .

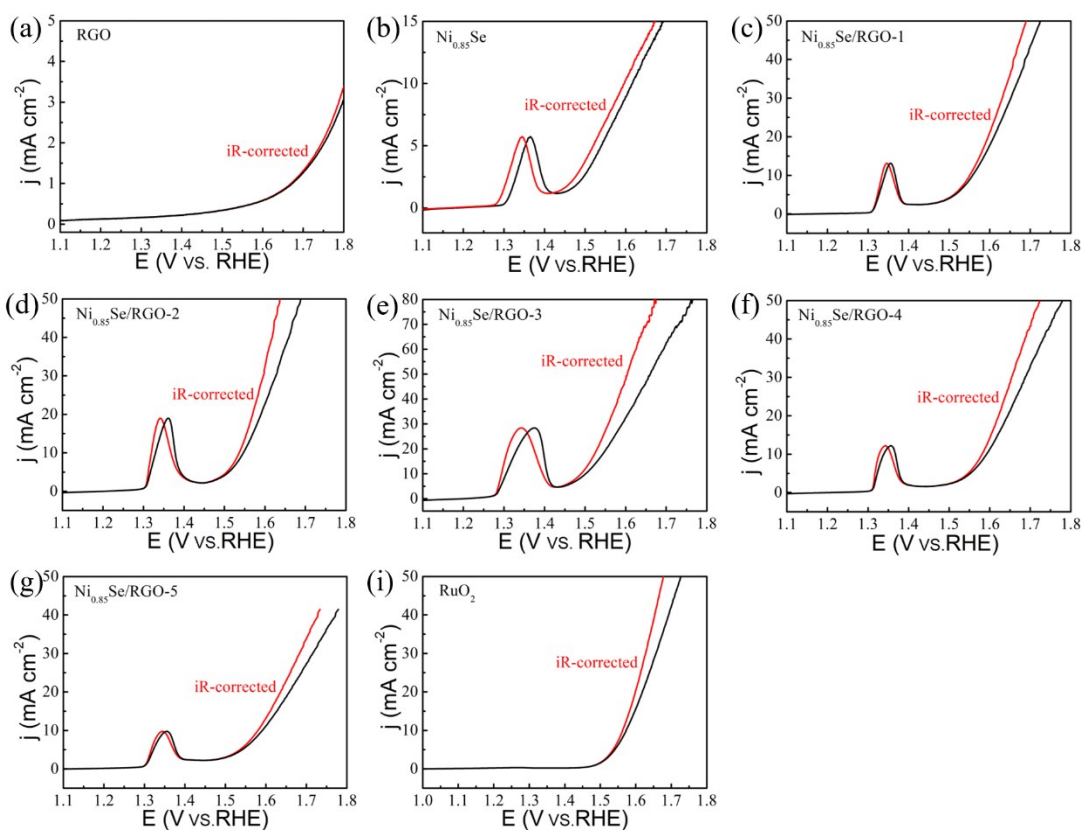

**Figure S8.** OER polarization curves of catalysts with and without iR compensation on GCE in 1.0 M KOH. The solution series resistances ( $R_s$ ) were determined by the EIS, all of the catalysts show the similar  $R_s$  ( $\sim 7 \Omega$ ).

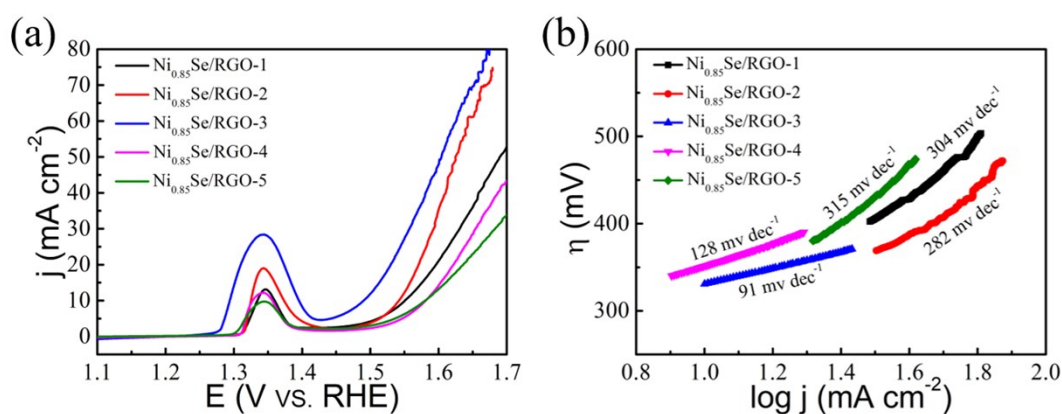

**Figure S9.** (a) the polarization curves and (b) Tafel plots derived from (a) of the various  $\text{Ni}_{0.85}\text{Se}/\text{RGO}$  composites.

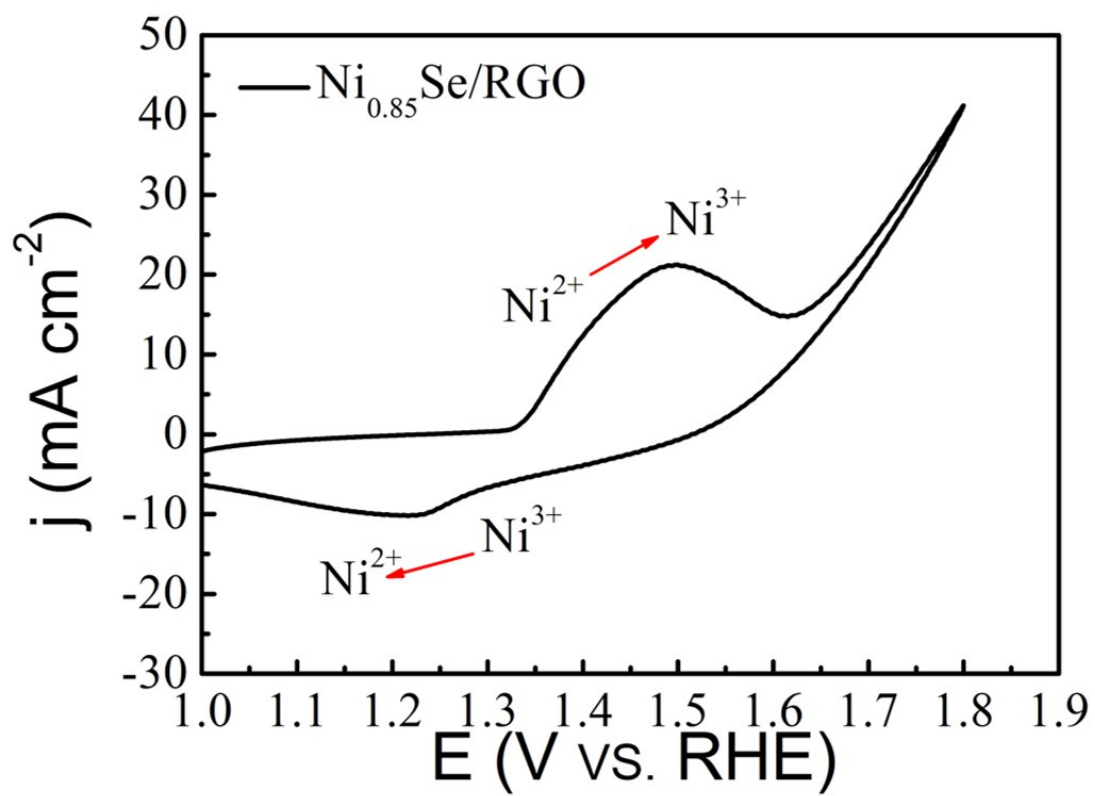

**Figure S10.** Cyclic voltammetry of  $\text{Ni}_{0.85}\text{Se}/\text{RGO}$  electrode.



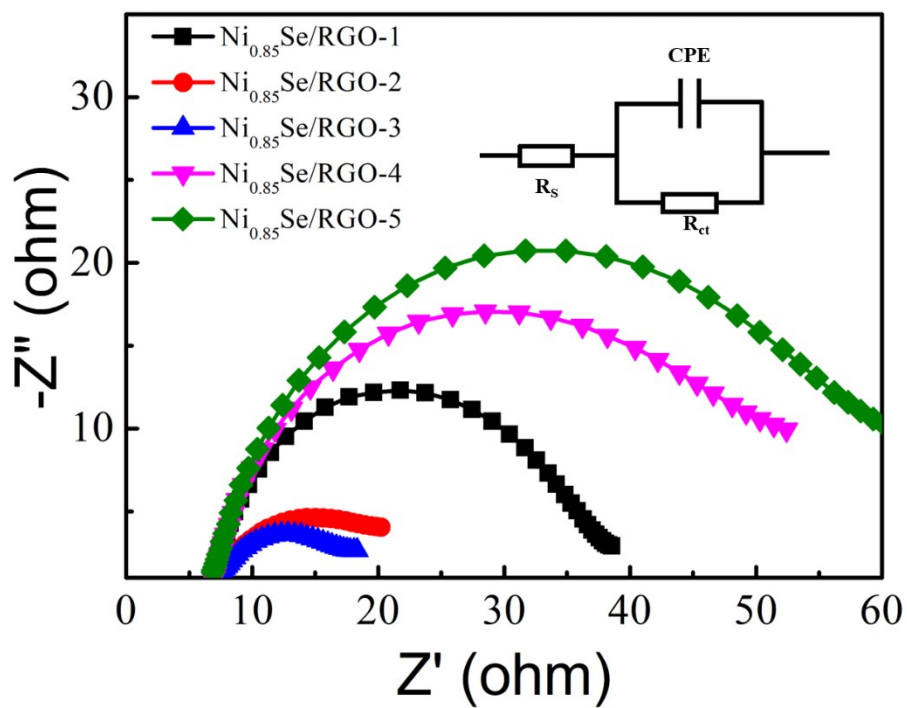

**Figure S11.** OER Nyquist plots of the various  $\text{Ni}_{0.85}\text{Se}/\text{RGO}$  composites at a potential of 1.42 V (vs. RHE), equivalent circuit model (the inset).



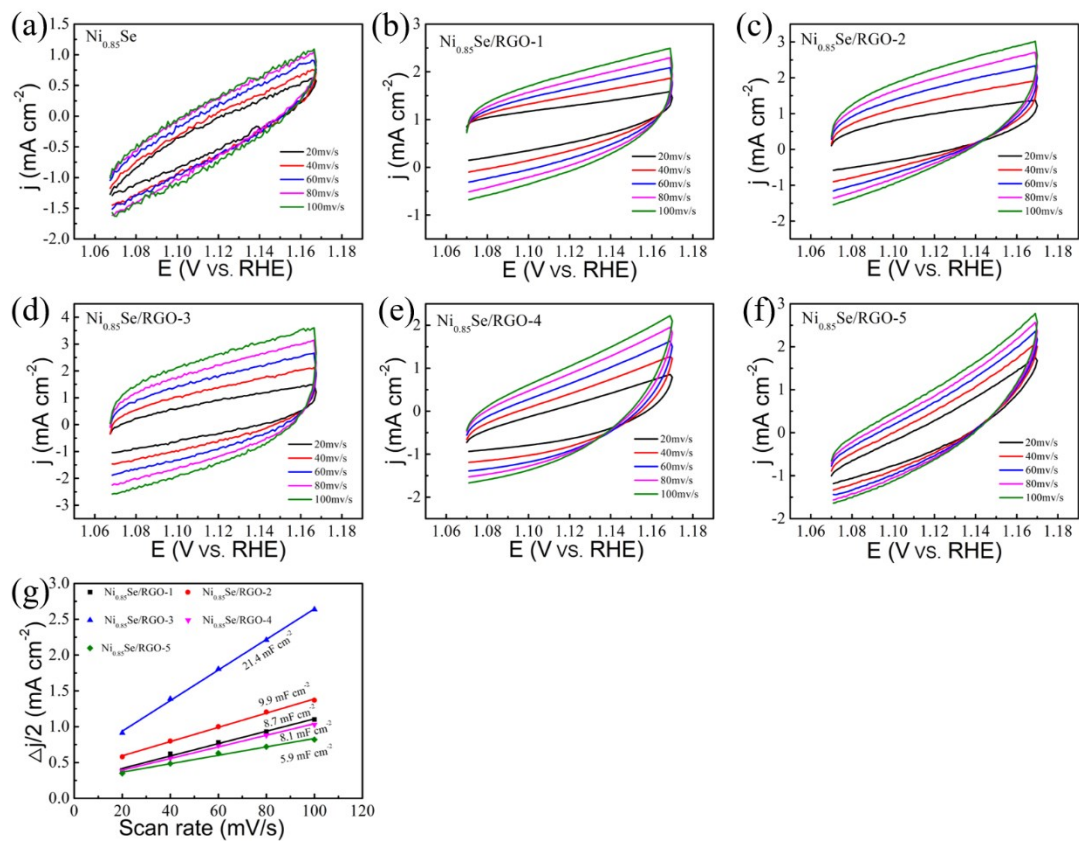

**Figure S12.** (a-f) Cyclic voltammograms at different scan rate for  $\text{Ni}_{0.85}\text{Se}$  and the various  $\text{Ni}_{0.85}\text{Se/RGO}$  composites; (g) Capacitive currents at 1.12 mV vs. RHE of various  $\text{Ni}_{0.85}\text{Se/RGO}$  composites for electrocatalytic OER.

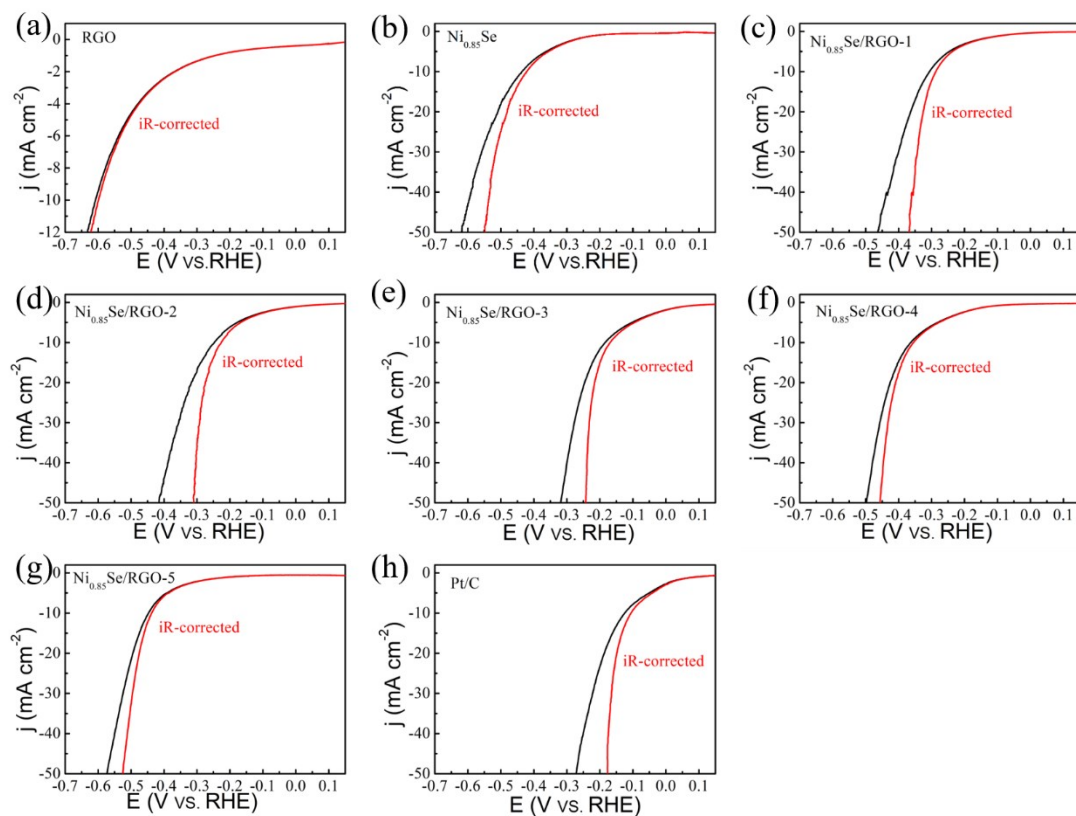

**Figure S13.** HER polarization curves of catalysts with and without iR compensation on GCE in 1.0 M KOH. The solution series resistances ( $R_s$ ) were determined by the EIS, all of the catalysts show the similar  $R_s$  ( $\sim 7 \Omega$ ).

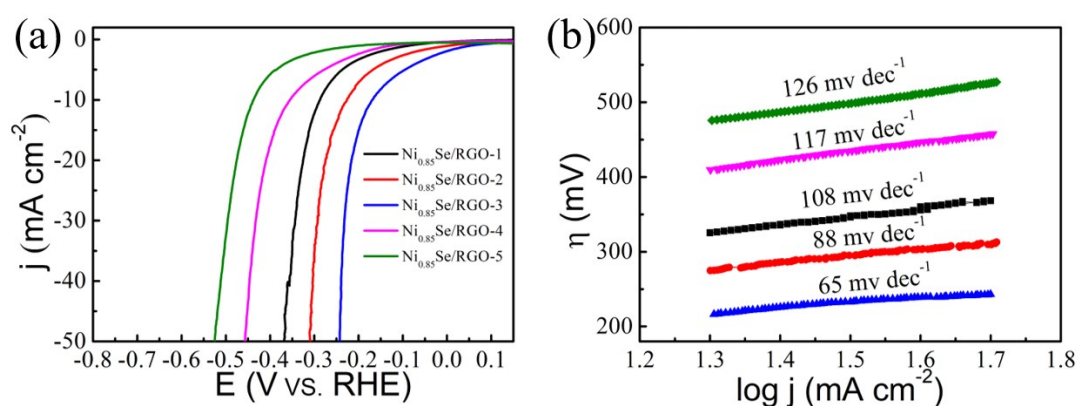

**Figure S14.** (a) the polarization curves and (b) Tafel plots derived from (a) of the various  $\text{Ni}_{0.85}\text{Se/RGO}$  composites.

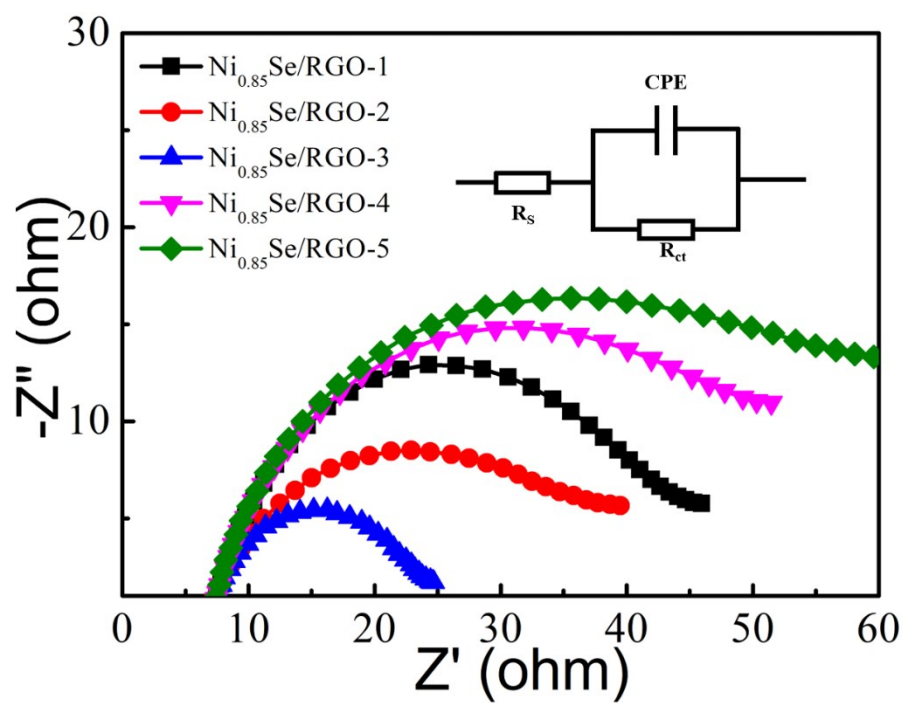

**Figure S15.** HER Nyquist plots of the various  $\text{Ni}_{0.85}\text{Se}/\text{RGO}$  composites at a potential of -0.35 V (vs. RHE), equivalent circuit model (the inset).

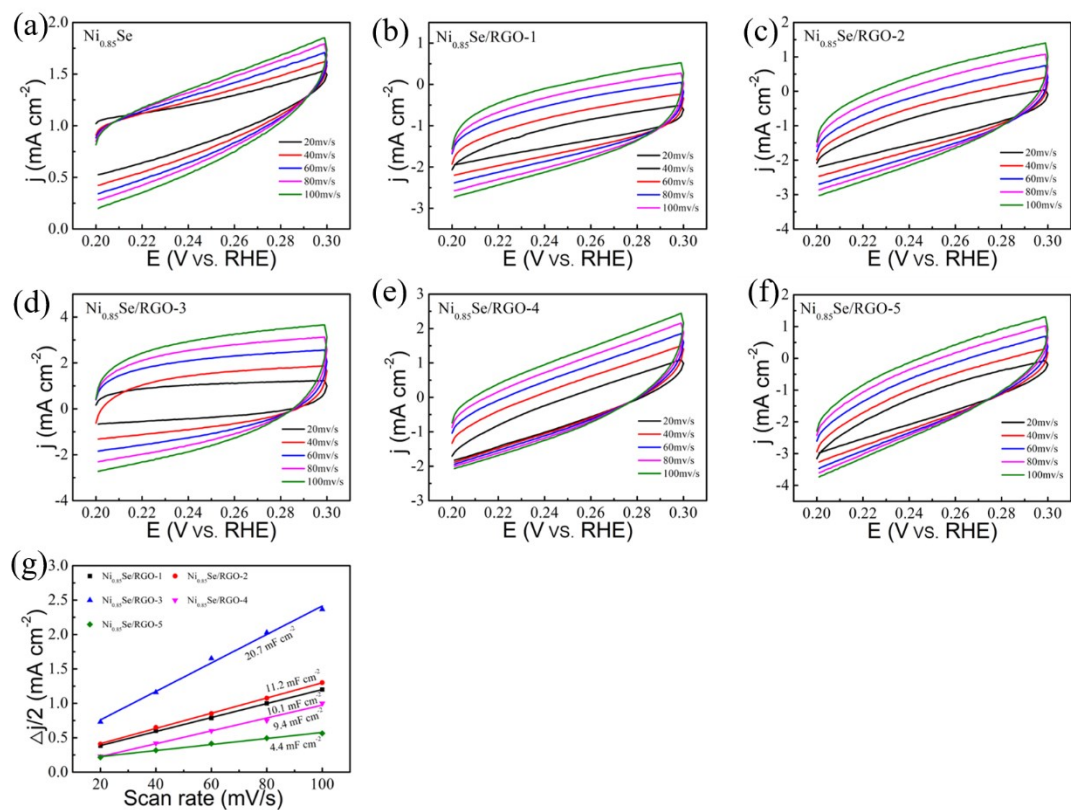

**Figure S16.** (a-f) Cyclic voltammograms at different scan rate for  $\text{Ni}_{0.85}\text{Se}$  and the various  $\text{Ni}_{0.85}\text{Se/RGO}$  composites; (g) Capacitive currents at 0.25 mV vs. RHE of various  $\text{Ni}_{0.85}\text{Se/RGO}$  composites for electrocatalytic HER.



### Calculation of activity and turnover frequency

Mass activity ( $J$ ,  $A\ g^{-1}$ ) and turnover frequency (TOF) were evaluated at an overpotential of  $\eta = 300\text{ mV}$  vs RHE.

The mass activity was calculated from the catalyst loading  $m$  ( $0.35\text{ mg cm}^{-2}$ ) and the measured current density  $J$  ( $\text{mA cm}^{-2}$ ).

$$\text{Mass activity} = J/m$$

Turnover frequency was calculated by the following equation:

$$\text{TOF} = (J \times A) / (4 \times F \times n)$$

Where  $J$  is the current density at a given overpotential,  $A$  is the surface area of the electrode, the number of 4 represents 4 electrons/mol of  $O_2$ ,  $F$  is the Faraday constant ( $96485.3\text{ C mol}^{-1}$ ), and  $n$  stands for the number of moles of Ni ions in  $Ni_{0.85}Se$  and  $Ni_{0.85}Se/RGO$  [S3].

**Table S1** Experimental conditions for the preparation of  $Ni_{0.85}Se/RGO$  Catalysts

| Catalysts            | $NiCl_2 \cdot 6H_2O$<br>(mg) | Se<br>(mg) | GO<br>(mg) |
|----------------------|------------------------------|------------|------------|
| $Ni_{0.85}Se/RGO$ -1 | 607                          | 237        | 30         |
| $Ni_{0.85}Se/RGO$ -2 | 607                          | 237        | 60         |
| $Ni_{0.85}Se/RGO$ -3 | 607                          | 237        | 90         |
| $Ni_{0.85}Se/RGO$ -4 | 607                          | 237        | 120        |
| $Ni_{0.85}Se/RGO$ -5 | 607                          | 237        | 150        |

**Table S2** Summary of OER performances of some catalysts in previous works.

| catalysts                                             | $\eta$ (mV) | $j$ (mA cm <sup>-2</sup> ) | reference |
|-------------------------------------------------------|-------------|----------------------------|-----------|
| Ni <sub>0.85</sub> Se/RGO                             | 30          | 320                        | This work |
| Ni <sub>0.85</sub> Se                                 | 10          | 367                        | This work |
| Ni <sub>0.85</sub> Se/GS                              | 10          | 302                        | [S1]      |
| Ti@Ni <sub>0.85</sub> Se                              | 30          | 270                        | [S2]      |
| NiSe-Ni <sub>0.85</sub> Se/CP                         | 10          | 300                        | [S3]      |
| Co <sub>9</sub> S <sub>8</sub> @MoS <sub>2</sub> /CNF | 10          | 430                        | [S4]      |
| Ni(OH) <sub>2</sub>                                   | 10          | 300                        | [S5]      |
| N-graphene-CoO                                        | 10          | 340                        | [S6]      |
| NiSe@NiOOH/NF                                         | 50          | 332                        | [S7]      |
| NiCo <sub>2</sub> S <sub>4</sub> /RGO                 | 10          | 366                        | [S8]      |
| Ni@graphene                                           | 10          | 370                        | [S9]      |
| Ni <sub>x</sub> Co <sub>3-x</sub> O <sub>4</sub>      | 10          | 420                        | [S10]     |

**Table S3** Summary of HER performances of some catalysts in previous works.

| catalysts                                             | j (mA cm <sup>-2</sup> ) | η (mV) | reference |
|-------------------------------------------------------|--------------------------|--------|-----------|
| Ni <sub>0.85</sub> Se/RGO                             | 10                       | 169    | This work |
| Ni <sub>0.85</sub> Se                                 | 10                       | 437    | This work |
| Ni <sub>0.85</sub> Se/GS                              | 10                       | 200    | [S1]      |
| Ti@Ni <sub>0.85</sub> Se                              | 30                       | 120    | [S2]      |
| NiSe-Ni <sub>0.85</sub> Se/CP                         | 10                       | 101    | [S3]      |
| Co <sub>9</sub> S <sub>8</sub> @MoS <sub>2</sub> /CNF | 10                       | 190    | [S4]      |
| Ni <sub>3</sub> S <sub>2</sub>                        | 10                       | 223    | [S11]     |
| NiSe                                                  | 10                       | 187    | [S12]     |
| NiSe <sub>2</sub>                                     | 40                       | 200    | [S13]     |
| NiSe <sub>2</sub> @NG                                 | 10                       | 248    | [S14]     |
| Ni <sub>1</sub> Co <sub>1</sub> - P                   | 10                       | 169    | [S15]     |
| Ni <sub>0.85</sub> Se-SnO <sub>2</sub>                | 25                       | 290    | [S16]     |

**Table S4** Summary of overall water splitting performances of some catalysts in previous works.

| catalysts                                 | j (mA cm <sup>-2</sup> ) | overall water splitting<br>performance (V) | reference |
|-------------------------------------------|--------------------------|--------------------------------------------|-----------|
| Ni <sub>0.85</sub> Se/RGO                 | 10                       | 1.64                                       | This work |
| Ni <sub>0.85</sub> Se/GS                  | 10                       | 1.7                                        | [S1]      |
| Ti@Ni <sub>0.85</sub> Se                  | 10                       | 1.66                                       | [S2]      |
| NiSe-Ni <sub>0.85</sub> Se/CP             | 10                       | 1.62                                       | [S3]      |
| Mo-Ni <sub>3</sub> S <sub>2</sub> /NF     | 10                       | 1.49                                       | [S17]     |
| Ni@NC                                     | 10                       | 1.6                                        | [S18]     |
| NiFe/NiCo <sub>2</sub> O <sub>4</sub> /NF | 10                       | 1.67                                       | [S19]     |



Note: GS, graphite substrate; CNF, carbon nanofibers; NF, Ni foam; CP, carbon fiber paper.

[S1] X. Wu, D. He, H. Zhang, H. Li, Z. Li, B. Yang, X. Zhang, Ni<sub>0.85</sub>Se as an efficient non-noble bifunctional electrocatalyst for full water splitting. *International Journal of Hydrogen Energy*, (2016) 10688-10694.

[S2] C. Yang, J. Zhang, G. Gao, D. Liu, R. Liu, R. Fan, Y. Wang, 3D Metallic Ti@Ni<sub>0.85</sub>Se with triple hierarchy as high-efficiency electrocatalyst for overall water splitting. *ChemSusChem*, (2019) 2271-2277.

[S3] Y. Chen, Z. Ren, H. Fu, X. Zhang, G. Tian, H. Fu, NiSe-Ni<sub>0.85</sub>Se heterostructure nanoflake arrays on carbon paper as efficient electrocatalysts for overall water splitting. *Small*, (2018) 1800763.

[S4] H. Zhu, J. Zhang, R. Yanzhang, M. Du, Q. Wang, When Cubic Cobalt Sulfide Meets Layered Molybdenum Disulfide: A Core–Shell System Toward Synergetic Electrocatalytic Water Splitting. *Adv Mater.* (2015) 4752-4759.

[S5] L-A. Stern, X. Hu, Enhanced oxygen evolution activity by NiO<sub>x</sub> and Ni(OH)<sub>2</sub> nanoparticles. *Faraday Discuss.* (2014) 363-379

[S6] S. Mao, Z. Wen, T. Huang, Y. Hou, J. Chen, High-performance bi-functional electrocatalysts of 3D crumpled graphene-cobalt oxide nanohybrids for oxygen reduction and evolution reactions. *Energy Environ Sci.* (2014) 609-616.

[S7] X. Li, G. Q. Han, Y.R. Liu, B. Dong, W. H. Hu, X. Shang, C. G. Liu, NiSe@NiOOH coreshell hyacinth-like nanostructures on nickel foam synthesized by

in situ electrochemical oxidation as an efficient electrocatalyst for the oxygen evolution reaction. *ACS applied materials & interfaces*, (2016) 20057-20066.

[S8] C. Shuai, Z. L. Mo, X. H. Niu, X. Yang, G. G. Liu, J. Wang, N. J. Liu , R. B. Guo, Hierarchical NiCo<sub>2</sub>S<sub>4</sub> nanosheets grown on graphene to catalyze the oxygen evolution reaction. *Journal of Materials Science*, 55(4), 1627-1636.

[S9] X. Li, G. Q. Han, Y. R. Liu, B. Dong, X. Shang, W. H. Hu, C. G. Liu, In situ grown pyramid structures of nickel diselenides dependent on oxidized nickel foam as efficient electrocatalyst for oxygen evolution reaction. *Electrochimica Acta*, (2016) 77-84.

[S10] Y. Li, P. Hasin, Y. Wu, Ni<sub>x</sub>Co<sub>3-x</sub>O<sub>4</sub> nanowire arrays for electrocatalytic oxygen evolution. *Advanced materials*, (2010) 1926-1929.

[S11] L. L. Feng, G. Yu, Y. Wu, G. D. Li, H. Li, Y. Sun, T. Asefa, W. Chen, X. Zou, *J. Am. Chem. Soc.*, (2015) 14023-14026.

[S12] C. Tang, N. Cheng, Z. Pu, W. Xing, X. Sun, *Angew. Chem. Int. Ed*, 2015, 54, 9351-9355.

[S13] B. Yu, X. Wang, F. Qi, B. Zheng, J. He, J. Lin, Y. Chen, Self-assembled coral-like hierarchical architecture constructed by NiSe<sub>2</sub> nanocrystals with comparable hydrogen-evolution performance of precious platinum catalyst. *ACS Applied Materials & Interfaces*, 9(8) (2017) 7154-7159.

[S14] W. Li, B. Yu, Y. Hu, X. Wang, D. Yang, Y. Chen, Core–Shell Structure of NiSe<sub>2</sub> Nanoparticles@ Nitrogen-Doped Graphene for Hydrogen Evolution Reaction in Both Acidic and Alkaline Media. *ACS Sustainable Chemistry & Engineering*, 7(4) (2019)

4351-4359.

[S15] C. Shuai, Z. Mo, X. Niu, P. Zhao, Q. Dong, Y. Chen, R. Guo, Nickel/cobalt bimetallic phosphides derived metal-organic frameworks as bifunctional electrocatalyst for oxygen and hydrogen evolution reaction. *Journal of Alloys and Compounds*, 847 (2020) 156514.

[S16] W. Hou, B. Zheng, F. Qi, J. He, W. Zhang, Y. Chen, Graphene wrapped self-assembled  $\text{Ni}_{0.85}\text{Se-SnO}_2$  microspheres as highly efficient and stable electrocatalyst for hydrogen evolution reaction. *Electrochimica Acta*, 283 (2018) 1146-1153.

[S17] J. Li, Z. Yang, Y. Lin, J. Wang, F. Jiao, Y. Gong, Self-supported molybdenum doping  $\text{Ni}_3\text{S}_2$  nanoneedles as efficient bifunctional catalysts for overall water splitting. *New Journal of Chemistry*, 20 (2020) 8578-8586.

[S18] Y. Xu, W. Tu, B. Zhang, S. Yin, Y. Huang, M. Kraft, R. Xu, Nickel Nanoparticles Encapsulated in Few - Layer Nitrogen - Doped Graphene Derived from Metal–Organic Frameworks as Efficient Bifunctional Electrocatalysts for Overall Water Splitting. *Advanced Materials*, 11 (2017) 1605957.

[S19] C. L. Xiao, Y. B. Li, X. Y. Lu, C. Zhao, Bifunctional porous  $\text{NiFe/NiCo}_2\text{O}_4/\text{Ni}$  foam electrodes with triple hierarchy and double synergies for efficient whole cell water splitting. *Advanced Functional Materials*, 20 (2016) 3515-3523.
